# Supplementary material for: A lithiation/delithiation mechanism of monodispersed MSn5 (M = Fe, Co and FeCo) nanospheres
Source: Royal Society of Chemistry journal article supplement (doi:10.1039/c4ta06960a), 2015-01-01
Supplement: c4ta06960a1.pdf [file c4ta06960a1.pdf]

## Supporting Information

### Lithiation/Delithiation Mechanism of Monodispersed $M\text{Sn}_5$ ( $M=\text{Fe}$ , $\text{Co}$ and $\text{FeCo}$ ) Nanospheres

Fengxia Xin,<sup>a</sup> Xiaoliang Wang,<sup>b</sup> Jianming Bai,<sup>c</sup> Wen Wen,<sup>d</sup> Huajun Tian,<sup>a</sup> Chunsheng Wang<sup>e,\*</sup> and Weiqiang Han<sup>a,\*</sup>

<sup>a</sup>*Ningbo Institute of Materials Technology & Engineering, Chinese Academy of Sciences, Ningbo, 315201, P. R. China*

<sup>e</sup>*Department of Chemical and Biomolecular Engineering University of Maryland College Park, MD 20742, USA*

<sup>b</sup>*Present address: Seo Inc., 3906 Trust Way, Hayward, CA 94545*

<sup>c</sup>*National Synchrotron Light Source, Brookhaven National Laboratory, Upton, New York 11973, United States*

<sup>d</sup>*Shanghai Synchrotron Radiation Facility, Shanghai Institute of Applied Physics, Chinese Academy of Sciences, Shanghai 201204, P. R. China*

Corresponding Author:

*E-mail: [hanweiqiang@nimte.ac.cn](mailto:hanweiqiang@nimte.ac.cn), [cswang@umd.edu](mailto:cswang@umd.edu)*

**Table S1** A Calculated Partial Reflection Table Containing Cell Length, Cell Angle, Cell Volume, Atom Site, Occupancy of  $\text{FeSn}_5$ ,  $\text{Fe}_{0.5}\text{Co}_{0.5}\text{Sn}_5$  and  $\text{CoSn}_5$ .

| Compound        | $\text{FeSn}_5$                      | $\text{Fe}_{0.5}\text{Co}_{0.5}\text{Sn}_5$ | $\text{CoSn}_5$                      |
|-----------------|--------------------------------------|---------------------------------------------|--------------------------------------|
| Rwp (%)         | 3                                    | 8.7                                         | 2.9                                  |
| Cell length (a) | 6.9137                               | 6.9188                                      | 6.9328                               |
| Cell length (b) | 6.9137                               | 6.9188                                      | 6.9328                               |
| Cell length (c) | 5.8897                               | 5.8777                                      | 5.7924                               |
| Cell angle      | $\alpha = \beta = \gamma = 90^\circ$ | $\alpha = \beta = \gamma = 90^\circ$        | $\alpha = \beta = \gamma = 90^\circ$ |
| Cell volume     | 281.5057                             | 281.366                                     | 278.792                              |
| Atom site (Fe)  | (0.5,0.5,0.25)                       | (0.5,0.5,0.25)                              |                                      |
| Atom site (Co)  |                                      | (0.5,0.5,0.25)                              | (0.5,0.5,0.25)                       |
| Atom site (Sn1) | (0,0,0.5)                            | (0,0,0.5)                                   | (0,0,0.5)                            |
| Atom site (Sn2) | (0.190, 0.607, 1/2)                  | (0.193, 0.606, 1/2)                         | (0.191, 0.610, 1/2)                  |
| Occupancy(Fe)   | 0.74                                 | 0.345                                       |                                      |
| Occupancy(Co)   |                                      | 0.345                                       | 0.83                                 |
| Occupancy(Sn)   | 1                                    | 1                                           | 1                                    |

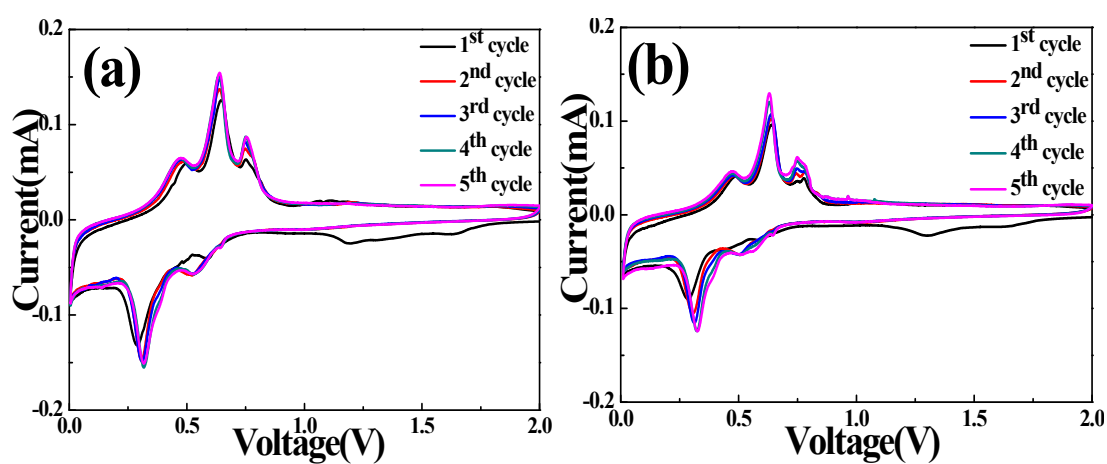

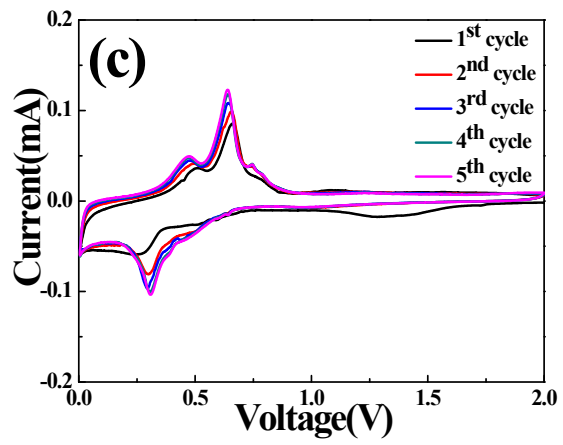

**Fig. S1 a-c)** Cyclic voltammograms of the initial five cycles scanned at a rate of 0.02 mV/s between 0.01-2 V in FeSn<sub>5</sub>, Fe<sub>0.5</sub>Co<sub>0.5</sub>Sn<sub>5</sub> and CoSn<sub>5</sub> nanospheres electrode in Li-ion batteries.

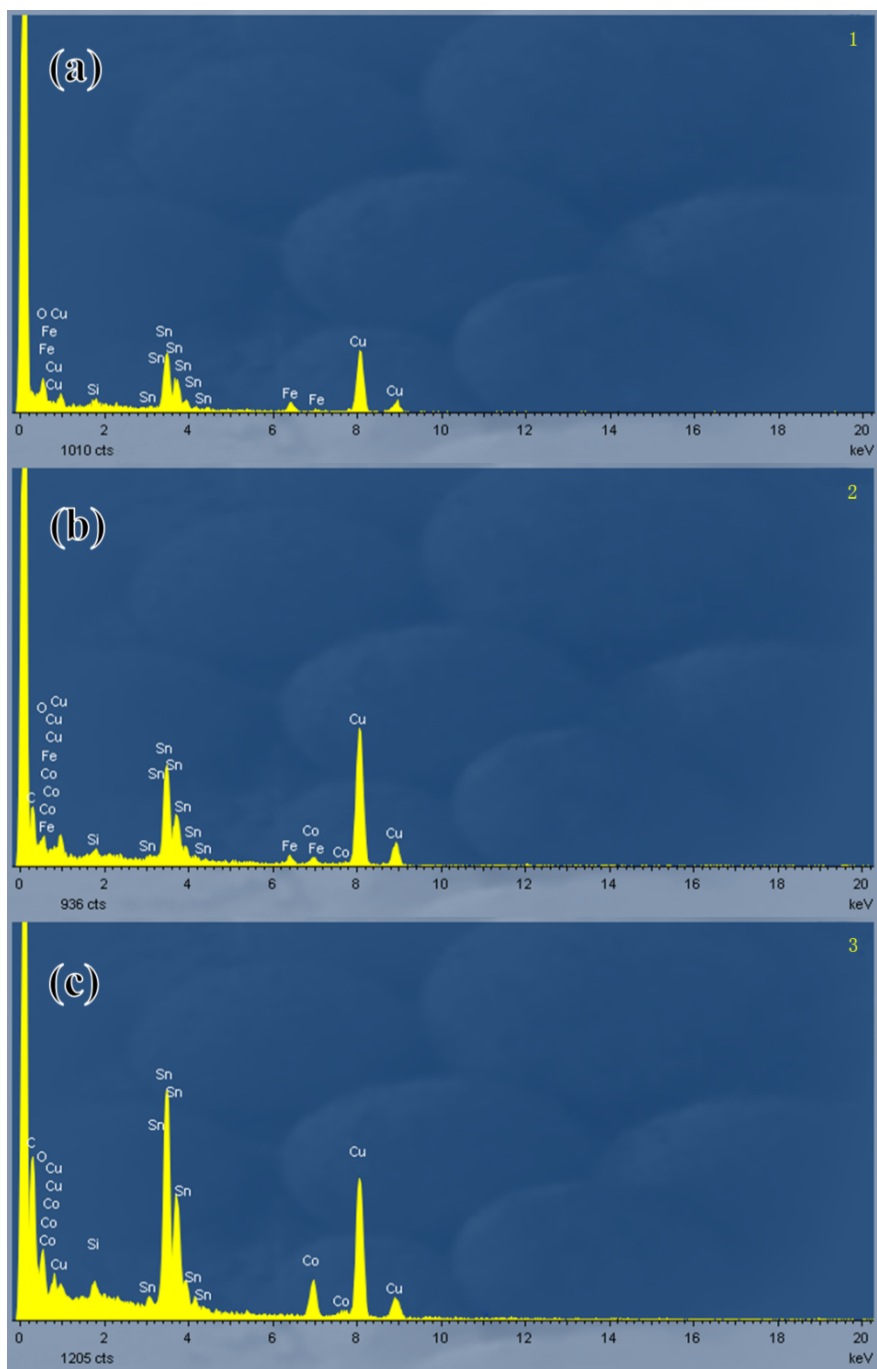

**Fig. S2** a-c) The EDS spectrum of FeSn<sub>5</sub>, Fe<sub>0.5</sub>Co<sub>0.5</sub>Sn<sub>5</sub> and CoSn<sub>5</sub> nanospheres after the first cycle.

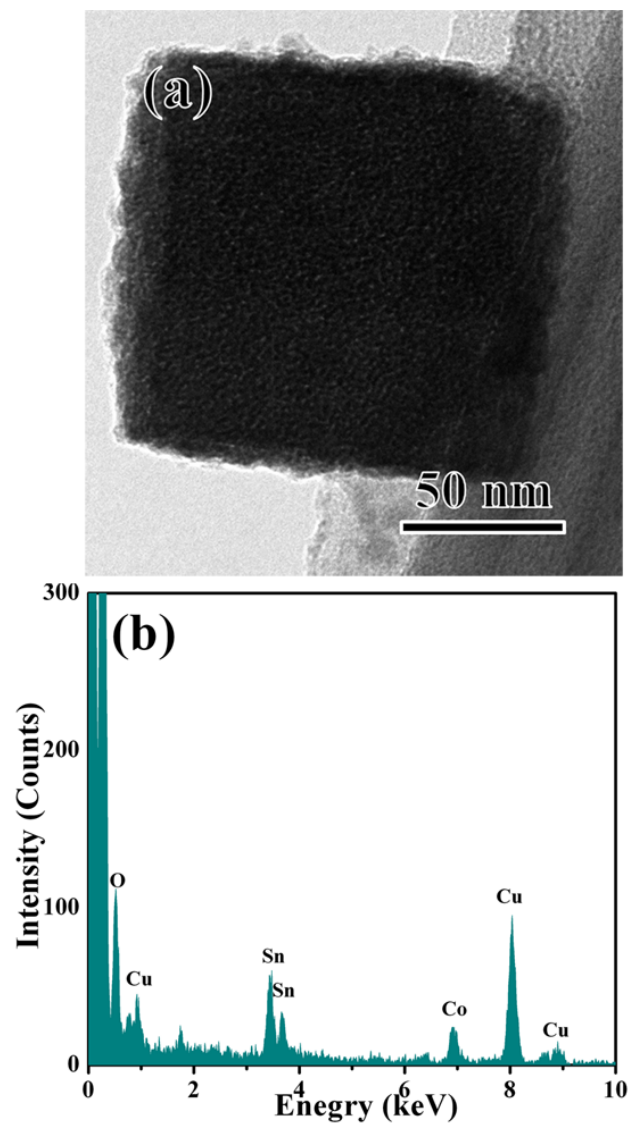

**Fig. S3** a) TEM and b) EDS images  $\text{Fe}_{0.5}\text{Co}_{0.5}\text{Sn}_5$  nanospheres after 100 cycles.

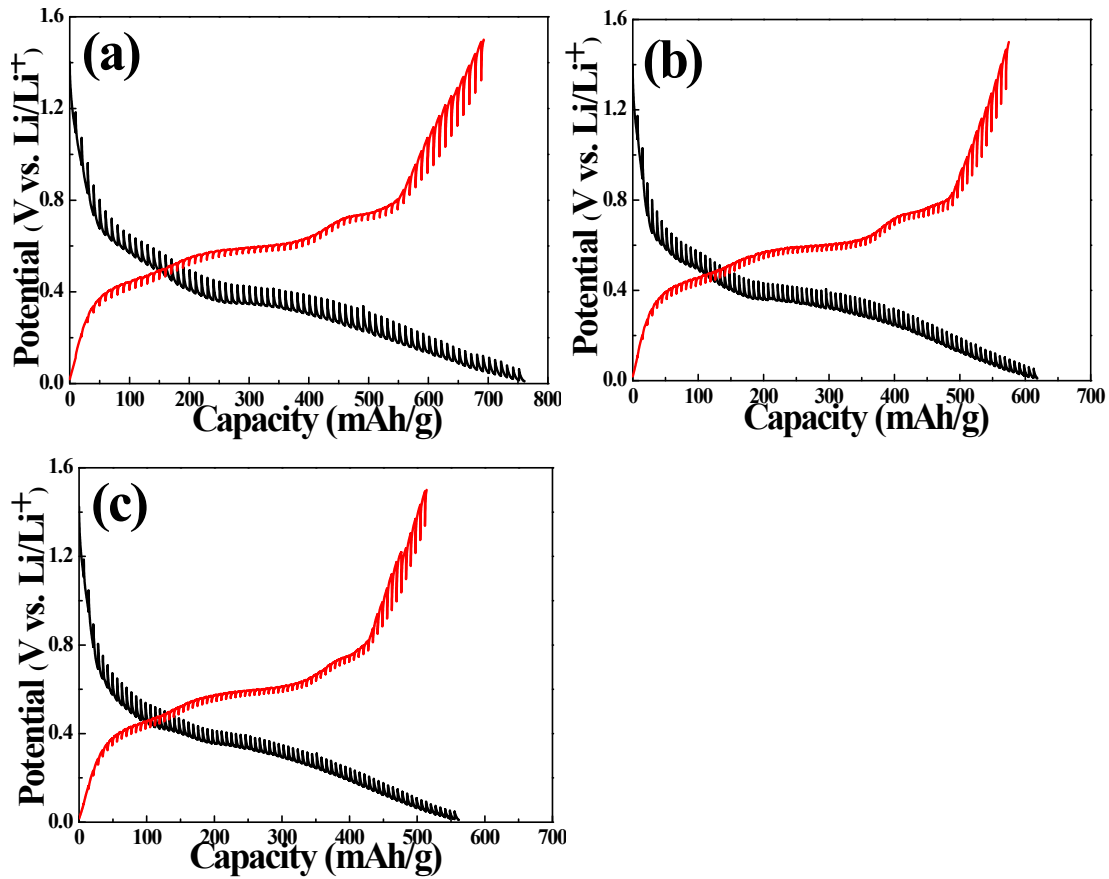

**Fig. S4** Comparison of potential response of a) FeSn<sub>5</sub> and b, c) Fe<sub>0.5</sub>Co<sub>0.5</sub>Sn<sub>5</sub> and CoSn<sub>5</sub> nanospheres anodes from GITT measurements in Li-ion batteries at 20 mA g<sup>-1</sup>, Before GITT measurement, the MSn<sub>5</sub> intermetallics were pre-charged/discharged for 5 cycles to active the electrodes.
